# Supplementary material for: The role of MEF2 transcription factors in dehydration and anoxia survival in Rana sylvatica skeletal muscle
Source: PeerJ. 2017 Nov 9;5:e4014. doi: 10.7717/peerj.4014 (PMC5682099; doi:10.7717/peerj.4014)
Supplement: Data S2 [file peerj-05-4014-s002.xlsx]

## Sheet: Figure 1
Condition	mef2a	mef2c
Control	3.64293	0.0153555
Control	3.21385	0.00927758
Control	1.96262	0.00473432
Control	3.78169	0.0130892
Dehydration 40%	1.89563	0.0224719
Dehydration 40%	1.97966	0.00157585
Dehydration 40%	2.17029	0.0345797
Dehydration 40%	6.14975	0.0451824
Anoxia 24 Hr	7.49535	0.0110168
Anoxia 24 Hr	6.12178	0.00675953
Anoxia 24 Hr	6.39572	0.00851005
Anoxia 24 Hr	3.50268	0.00789115

## Sheet: Figure 2
Condition	MEF2A	P-MEF2A	MEF2C	P-MEF2C
Control	1.03407	1.11716	0.890755	0.732287
Control	0.993386	1.19588	1.15064	1.29698
Control	0.997848	0.97589	1.04036	0.905776
Control	0.974693	0.711073	0.918245	1.06495
Dehydration 40%	0.795077	0.671447	0.909396	0.887484
Dehydration 40%	1.07912	0.859387	0.916519	1.01369
Dehydration 40%	0.859083	0.959013	0.746194	1.02689
Dehydration 40%	0.945873	0.988582	0.910445	0.603835
Rehydration	0.226833	0.890454	0.714015	1.09482
Rehydration	0.899995	0.944051	0.734267	0.706538
Rehydration	0.956113	1.11339	0.349615	0.921689
Rehydration	0.863174	0.854346	0.786056	0
				Values in red are outliers and were removed from all calculations

## Sheet: Figure 3
Condition	MEF2A	P-MEF2A	MEF2C	P-MEF2C
Control	0.978035	0.773387	0.897235	0.852494
Control	0.998844	0.837543	1.11697	0.90264
Control	1.17696	0.97974	1.03318	1.17668
Control	0.846165	1.40933	0.95262	1.06818
Anoxia 4 Hr	0.341389	0.483445	1.19631	1.34978
Anoxia 4 Hr	1.06695	0.799097	1.48605	1.42662
Anoxia 4 Hr	0.943105	0.62119	1.34585	1.44763
Anoxia 4 Hr	0.947471	0.590099	0.582416	1.36399
Anoxia 24 Hr	0.641835	0.54297	0.268005	0.228132
Anoxia 24 Hr	0.694089	0.55246	0.591583	1.0856
Anoxia 24 Hr	0.778805	1.21934	0.619519	1.01749
Anoxia 24 Hr	0.769601	0.999543	0.493479	1.1548
				Values in red are outliers and were removed from all calculations

## Sheet: Figure 4
Condition	MEF2A	P-MEF2A	MEF2C	P-MEF2C
Control	1.14861	0.727291	0.9537	0.819707
Control	0.807442	1.3062	1.20467	0.98549
Control	0.907952	0.991217	0.9537	1.04962
Control	1.13599	0.975294	0.887927	1.14518
Dehydration 40%	0.93645	1.07208	0.89167	1.00707
Dehydration 40%	0.690804	0.965482	0.70859	0.899033
Dehydration 40%	0.953934	1.24234	0.81345	0.819707
Dehydration 40%	0.959953	0.813167	0.999114	0.844736
Anoxia 24 Hr	1.6819	1.00727	0.876373	1.07776
Anoxia 24 Hr	1.49745	1.02842	1.26566	1.05136
Anoxia 24 Hr	1.28115	1.19874	1.2465	1.09565
Anoxia 24 Hr	1.58057	1.15282	1.20751	1.12364

## Sheet: Figure 5
Condition	MEF2A	P-MEF2A	MEF2C	P-MEF2C
Control	0.977164	0.75582	0.841323	1.0287
Control	1.04972	1.00776	0.856356	1.05182
Control	0.934058	1.03271	1.31269	0.92195
Control	1.03906	1.20371	0.989632	0.997529
Dehydration 40%	0.898527	1.14496	0.978833	0.957406
Dehydration 40%	1.16046	1.2597	1.27516	0.950175
Dehydration 40%	0.928135	1.26783	0.922738	0.869076
Dehydration 40%	1.28496	1.22628	1.02892	0.983184
Anoxia 24 Hr	1.20758	1.28416	0.82389	1.30181
Anoxia 24 Hr	0.883724	1.15553	1.02187	1.3716
Anoxia 24 Hr	0.952665	1.47697	0.930322	1.25373
Anoxia 24 Hr	1.02817	1.41497	1.091	1.36795

## Sheet: Figure 6
Condition	glut4	calr	mck	bck
Control	0.191297	0.00557127	67.1003	0.195885
Control	0.177542	0.00722155	74.5727	0.286166
Control	0.105103	0.00609512	34.6568	0.0933167
Control	0.219802	0.0110134	195.875	0.555163
Dehydration 40%	0.0890179	0.00434046	94.3822	0.367748
Dehydration 40%	0.257549	0.00298356	19.7145	0.185103
Dehydration 40%	0.157542	0.00408543	37.776	0.0796078
Dehydration 40%	0.306043	0.0192115	163.163	0.495842
Anoxia 24 Hr	1.15823	0.00814018	190.013	0.649226
Anoxia 24 Hr	0.801757	0.00872032	145.555	0.53473
Anoxia 24 Hr	0.0142837	0.00787547	119.428	0.495178
Anoxia 24 Hr	1.54989	0.00657896	93.3394	0.42759
